# Supplementary material for: Improved water splitting efficiency of Au-NP-loaded Ga2O3 thin films in the visible region under strong coupling conditions
Source: Royal Society of Chemistry journal article supplement (doi:10.1039/d2na00768a), 2022-11-16
Supplement: d2na00768a1.pdf [file d2na00768a1.pdf]

# Improved water splitting efficiency of Au-NP-loaded Ga<sub>2</sub>O<sub>3</sub> thin films in the visible region under strong coupling conditions

*Yaguang Wang, <sup>a</sup> Xu Shi, <sup>b</sup> Tomoya Oshikiri, <sup>a,c</sup> Hiroaki Misawa <sup>a,d\*</sup>*

<sup>a</sup> Research Institute for Electronic Science, Hokkaido University, Sapporo, Japan.

<sup>b</sup> Creative Research Institution, Hokkaido University, Sapporo, Japan.

<sup>c</sup> Institute of Multidisciplinary Research for Advanced Materials, Tohoku University, Sendai, Japan.

<sup>d</sup> Center for Emergent Functional Matter Science, National Yang Ming Chiao Tung University, Taiwan.

**Corresponding Author**

(\* E-mail: [misawa@es.hokudai.ac.jp](mailto:misawa@es.hokudai.ac.jp))

## Supplementary Data

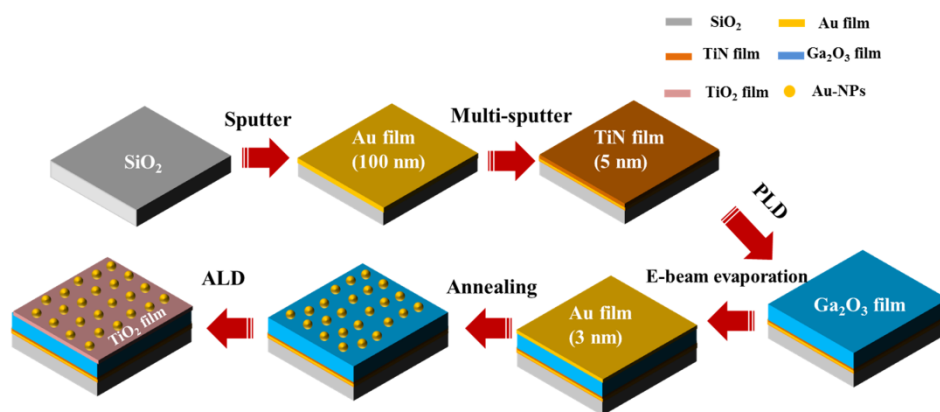

Fig. S1 Schematic of TAGA fabrication

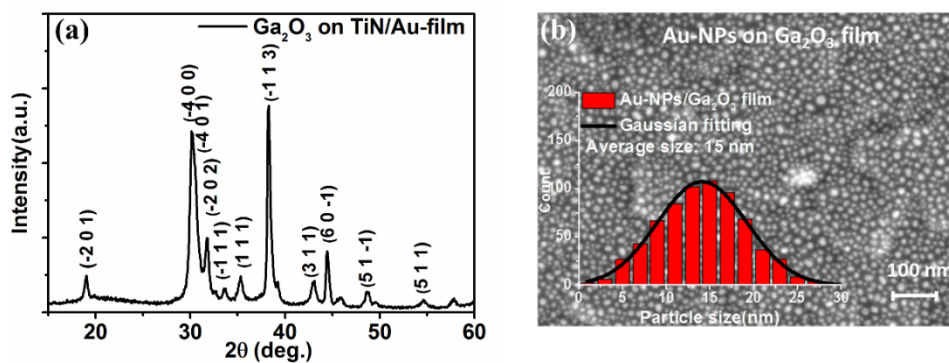

Fig. S2 (a) XRD of Ga<sub>2</sub>O<sub>3</sub> film on TiN/Au-film. (b) Top-view SEM image of the Au-NPs on Ga<sub>2</sub>O<sub>3</sub> and the size analysis by ImageJ.

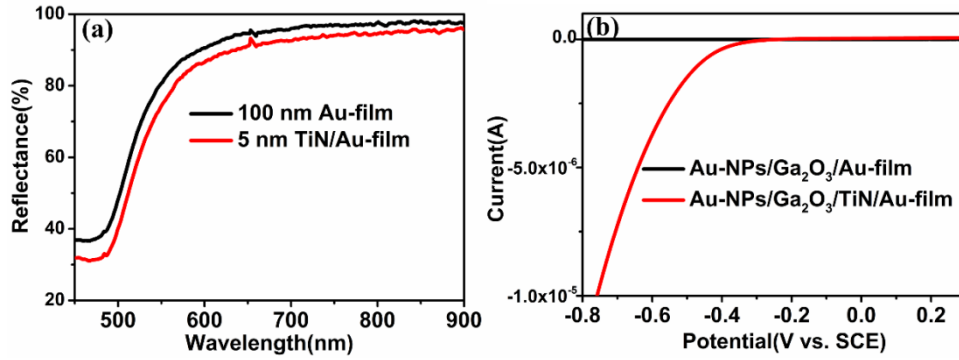

**Fig. S3** (a) Reflectance spectra of Au film on SiO<sub>2</sub> with and without TiN film. (b) I-V curves of Au-NPs/Ga<sub>2</sub>O<sub>3</sub>/Au-film with and without TiN measured under dark conditions.

When Ga<sub>2</sub>O<sub>3</sub> was deposited directly on the Au film, poor semiconductor properties of Ga<sub>2</sub>O<sub>3</sub> film on Au-film were observed, as shown by the black line in Fig. S3b. After the addition of the TiN layer, the resulting I-V curve showed obvious semiconductor characteristics with a very low dark current under a positive potential. The current of Au-NPs/Ga<sub>2</sub>O<sub>3</sub>/TiN/Au-film generated at a negative potential range under dark conditions indicated a better electron transfer due to the superior semiconductor properties of Ga<sub>2</sub>O<sub>3</sub> film on TiN/Au-film.

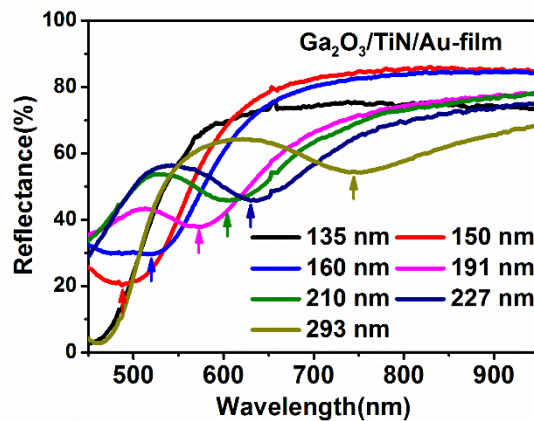

**Fig. S4** Reflection spectra of Ga<sub>2</sub>O<sub>3</sub>/TiN/Au-film with different thicknesses of Ga<sub>2</sub>O<sub>3</sub> film. Corresponding colorful arrows mark the cavity modes.

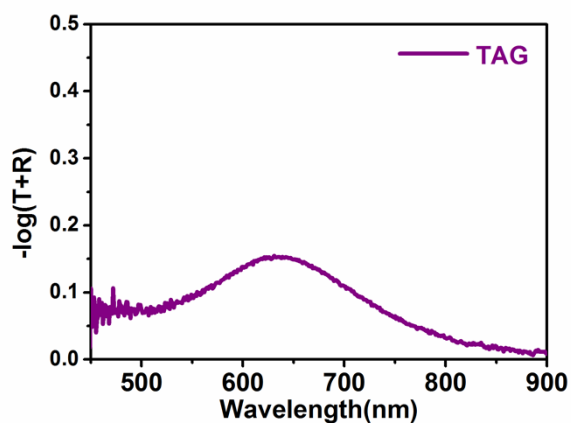

Fig. S5 (a) Absorption spectra of TAG. The thickness of  $\text{TiO}_2$  was 4 nm.

When the  $\text{Ga}_2\text{O}_3$  film was deposited on sapphire, only the LSPR mode existed in the structure of  $\text{TiO}_2/\text{Au-NPs}/\text{Ga}_2\text{O}_3/\text{sapphire}$  (TAG) without a cavity mode because of the similar refractive index between  $\text{Ga}_2\text{O}_3$  ( $n=1.90$ ) and sapphire ( $n=1.77$ ).

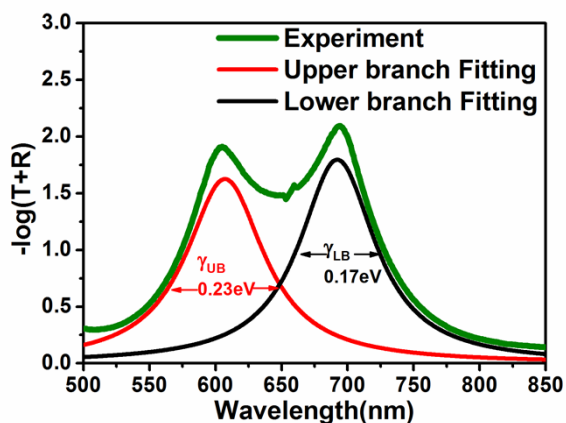

Fig. S6 Spectral separation of the absorption spectrum of TAGA with a tuning structure by Lorentz fitting.

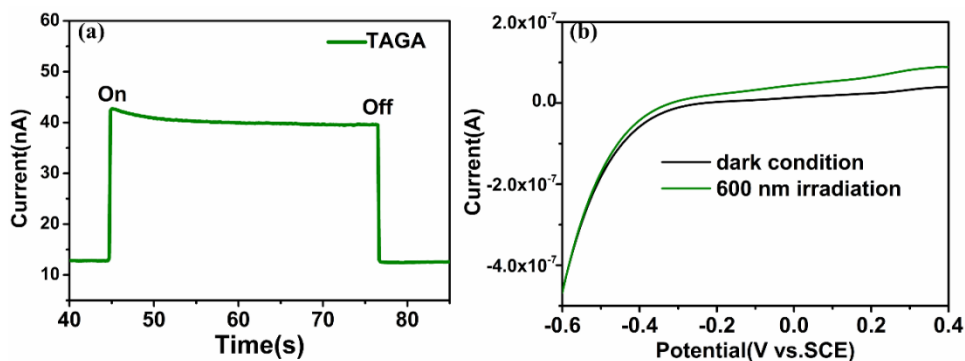

Fig. S7 (a) I-t curve of TAGA under 600 nm irradiation. A bias potential was applied as +0.3 V vs. SCE. (b) I-V curve of TAGA samples measured in 0.1 mol/L KOH solution under dark conditions and 600 nm irradiation.

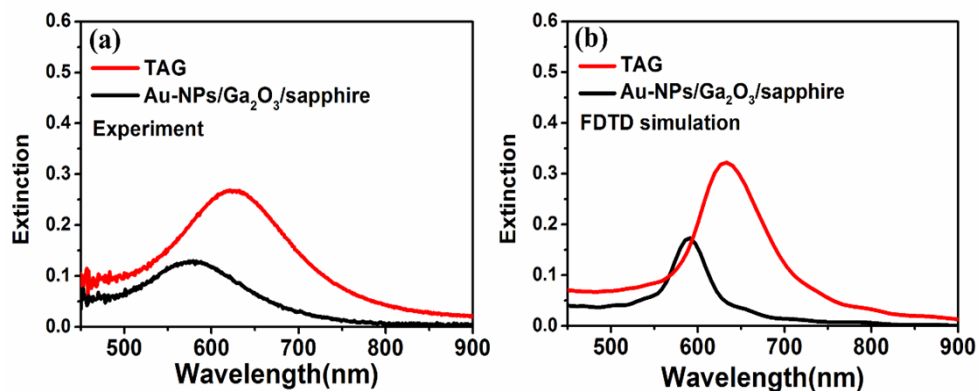

Fig. S8 (a) Experimental extinction spectra of TAG and Au-NPs/Ga<sub>2</sub>O<sub>3</sub>/sapphire. (b) FDTD simulation of extinction spectra of TAG and Au-NPs/Ga<sub>2</sub>O<sub>3</sub>/sapphire. The thickness of Ga<sub>2</sub>O<sub>3</sub> was 210 nm.

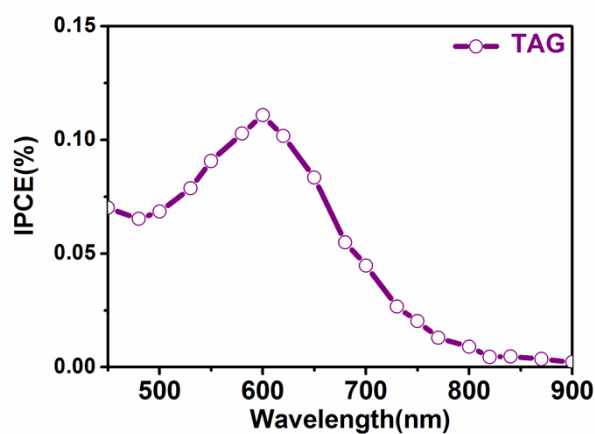

Fig. S9 IPCE of TAG measured in 0.1 mol/L KOH solution. The applied bias potential was + 0.3 V vs. SCE.

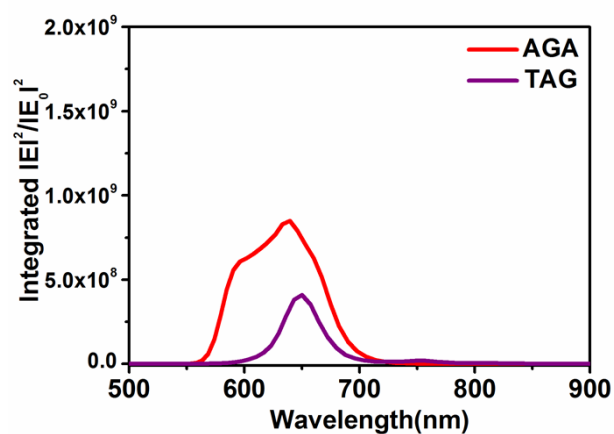

Fig. S10 FDTD simulation of the near-field spectra at the interface of the Au-NPs/Ga<sub>2</sub>O<sub>3</sub> in AGA and TAG. The monitor position (black line) is 1 nm above the Au-NPs/Ga<sub>2</sub>O<sub>3</sub> interface.

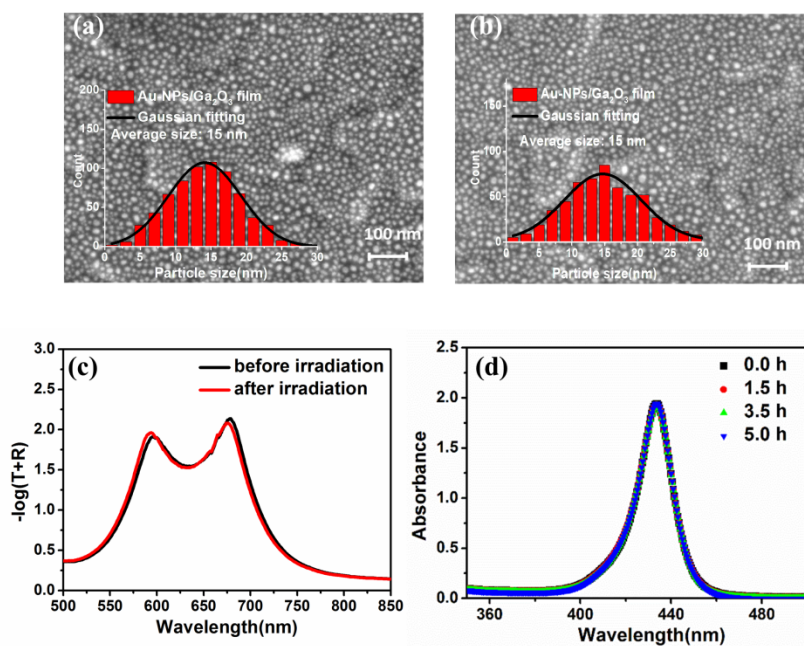

Fig. S11 Top-view SEM images and the size analysis of the Au-NPs on TAGA (a) before and (b) after 6 h irradiation under visible light; (c) Absorption spectra of TAGA before and after 6 h irradiation under visible light; (d) Absorbance spectra of  $\text{TiO}(\text{tpypH}_4)^{4+}$  solution after the addition of electrolyte for  $\text{O}_2$  evolution using TAGA photoanode under visible light. The legend indicates the irradiation time.

Fig. S11a and b showed the SEM image of Au-NPs and surface morphology on TAGA and the analyzed particle distribution before and after irradiation. No apparent differences in surface morphology and particle size distribution were observed. In addition, after 6 h irradiation under visible light, the absorption spectra of TAGA shown in Fig. S11c were almost the same before and after irradiation, indicating that no self-oxidation of the photoanode occurred during the measurement.

Since no sacrificial electron donor or acceptor was used in our experiment, the main possible side reaction product is  $\text{H}_2\text{O}_2$ , as reported in our previous paper.<sup>1</sup> To examine this possible side reaction product of  $\text{H}_2\text{O}_2$ , as shown in Fig. S11d, a spectrophotometric analysis using a Ti-porphyrin reagent was applied to detect the formation of  $\text{H}_2\text{O}_2$  during water oxidation.<sup>2</sup>  $\text{TiO}(\text{tpypH}_4)^{4+}$  solution ( $5.0 \times 10^{-5}$  mol/L) was prepared by dissolving [Oxo[5,10,15,20-tetra(4-pyridyl)porphyrinato]titanium(IV)] in hydrochloric acid solution. During the measurement, 100  $\mu\text{L}$  electrolyte for  $\text{O}_2$  evolution using TAGA after different irradiation time was added into 300  $\mu\text{L}$   $\text{TiO}(\text{tpypH}_4)^{4+}$  solution. However, according to the absorbance result in Fig. S11d, no  $\text{H}_2\text{O}_2$  was detected after irradiation. It meant this side reaction did not occur during water oxidation.

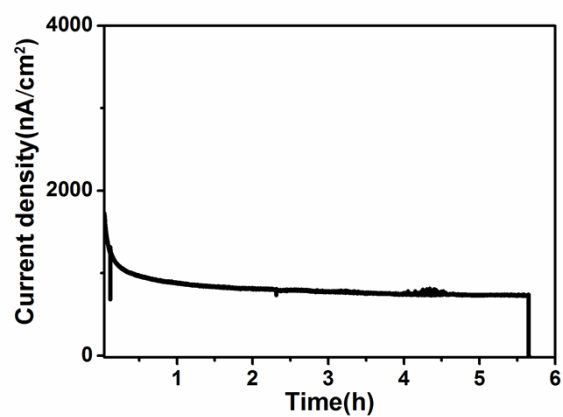

Fig. S12 Photocurrent density of TAGA under the same experimental condition for oxygen evolution.

### Reference

1. Y. Nishijima, K. Ueno, Y. Kotake, K. Murakoshi, H. Inoue and H. Misawa, *J. Phys. Chem. Lett.*, 2012, **3**, 1248-1252.
2. C. Matsubara, N. Kawamoto and K. Takamura, *Analyst*, 1992, **117**, 1781-1784.
